# Supplementary figures and images for: Integrated Bioinformatic and Targeted Deletion Analyses of the SRS Gene Superfamily Identify SRS29C as a Negative Regulator of Toxoplasma Virulence
Source: PubMed Central journal article supplement — mBio. 2012 Nov 13;3(6):e00321-12. doi: 10.1128/mBio.00321-12 (PMC3509429; doi:10.1128/mbio.00321-12), 2012-11-13

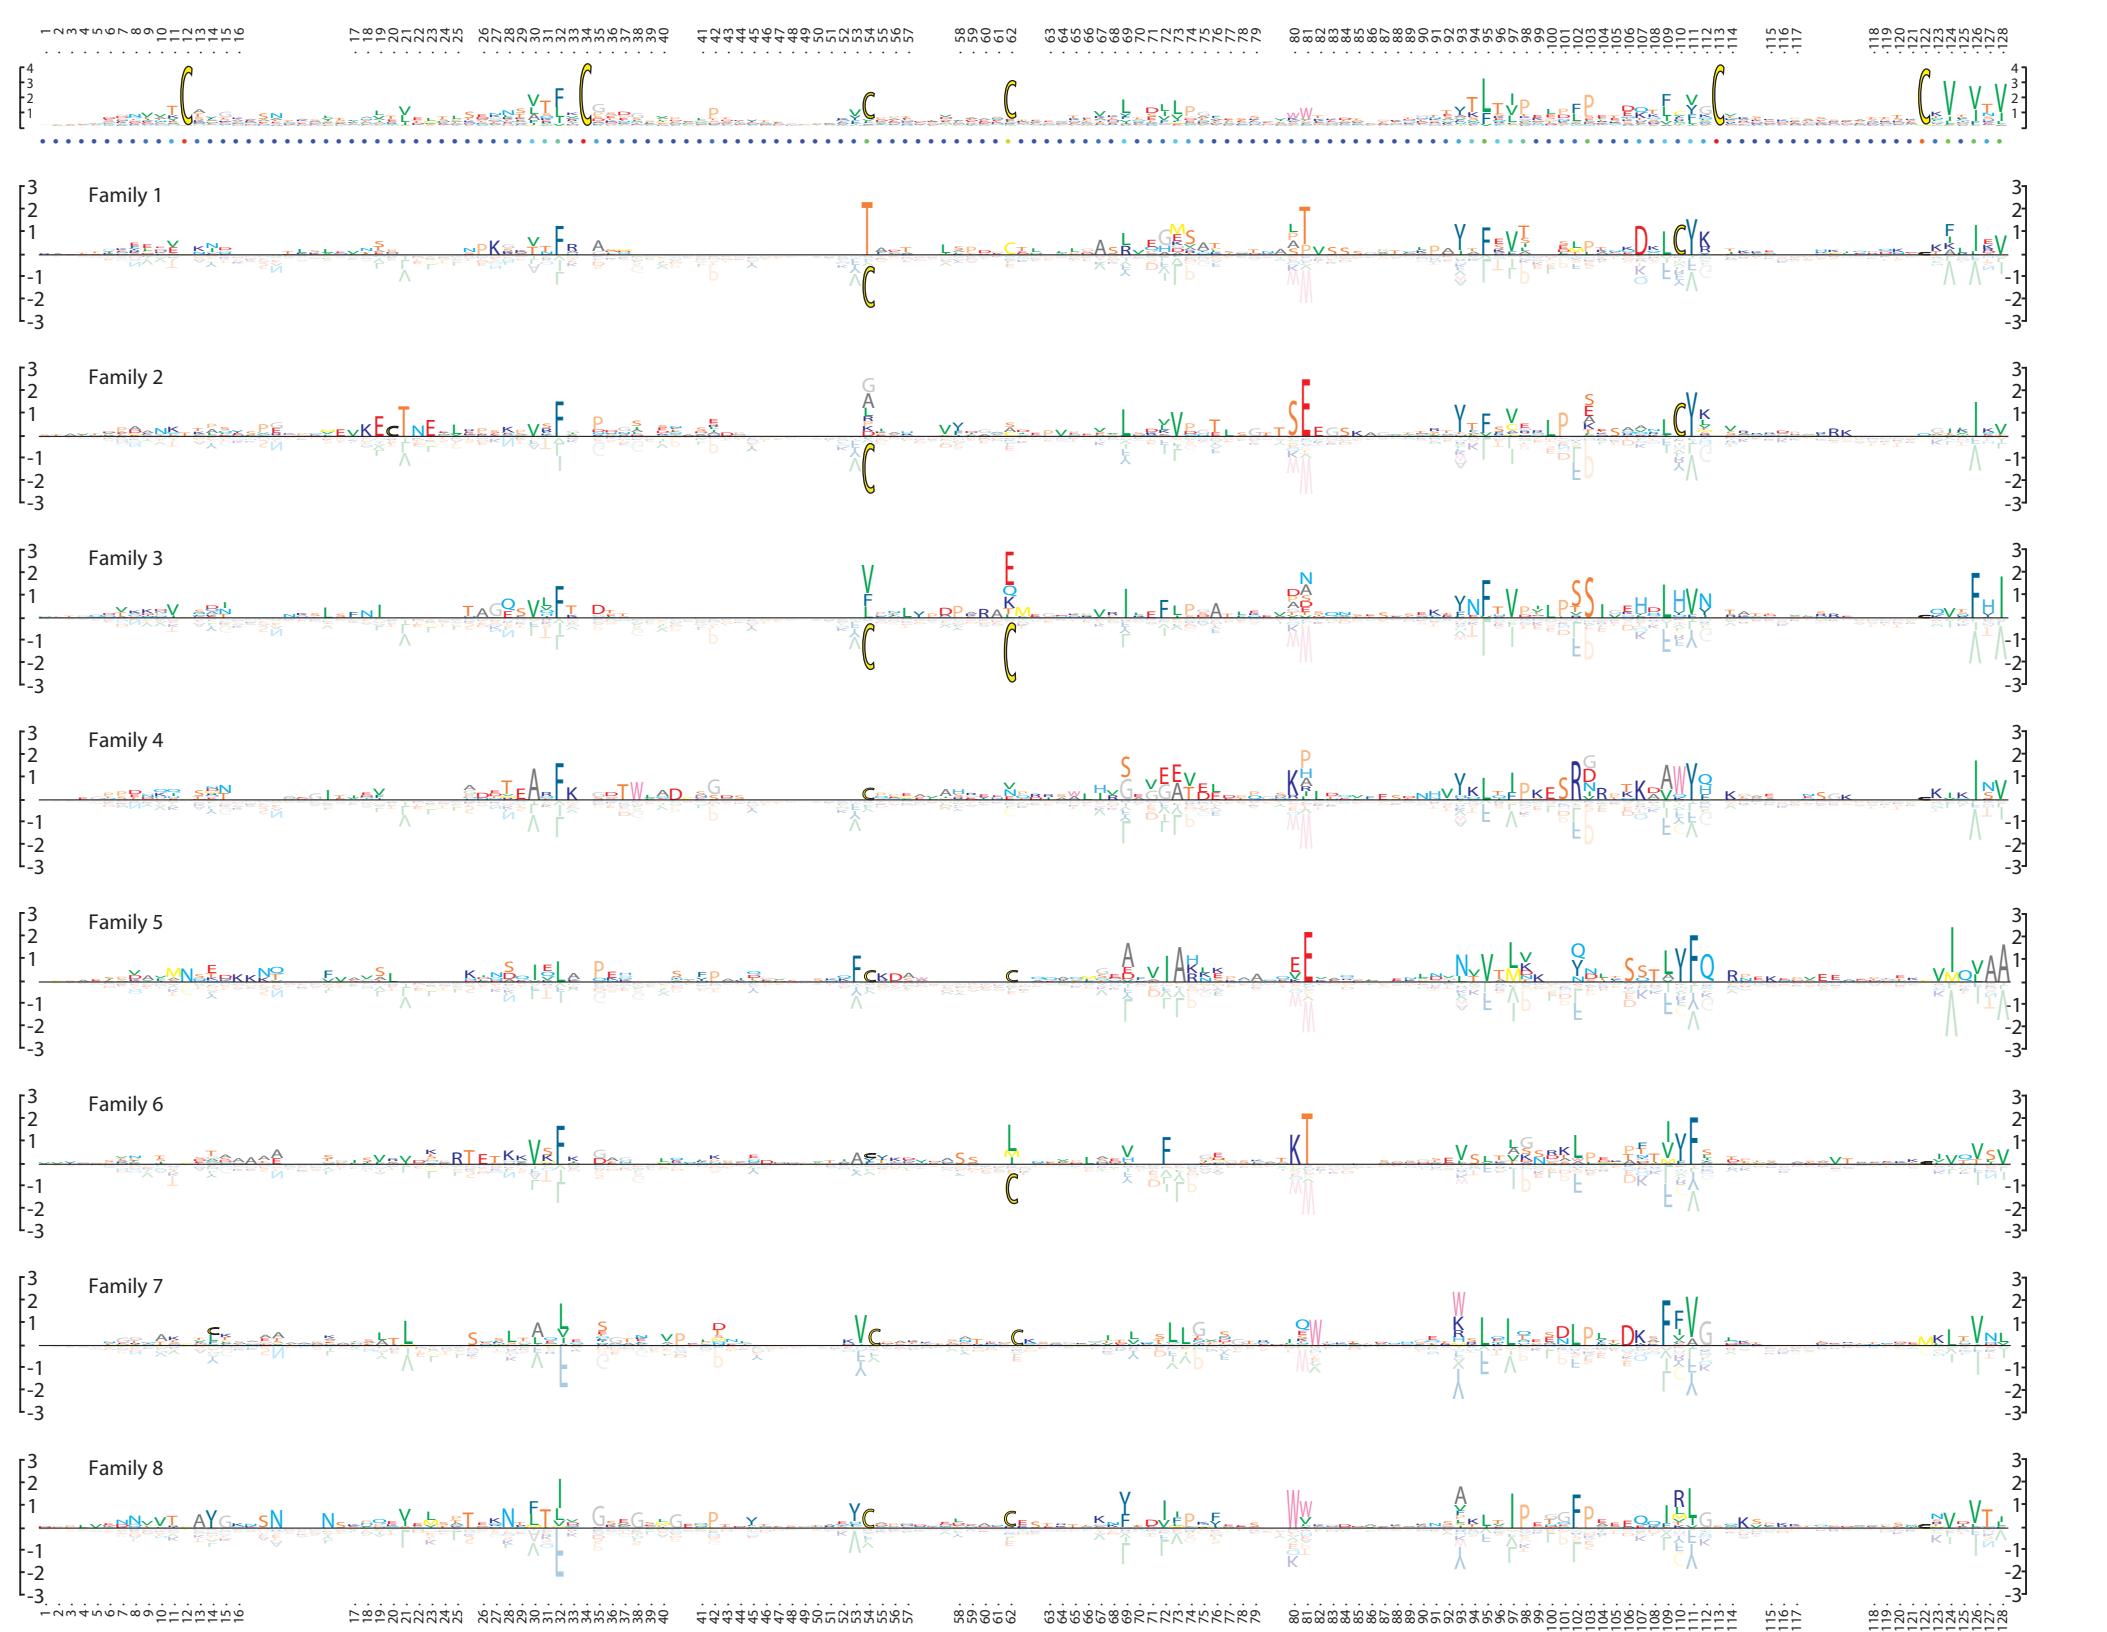

Supplement: mbo005121351sf01.pdf [file mbo005121351sf01.pdf]
